# Supplementary material for: Role of non-metallic atoms in enhancing the catalytic activity of nickel-based compounds for hydrogen evolution reaction
Source: PubMed Central journal article supplement — Chem Sci. 2018 Jan 4;9(7):1822–30. doi: 10.1039/c7sc04851c (PMC5892335; doi:10.1039/c7sc04851c), 2018-01-04
Supplement: SC-009-C7SC04851C-s001.pdf [file SC-009-C7SC04851C-s001.pdf]

# Role of Non-Metallic Atom in Enhancing Catalytic Activity of Nickel-Based Compounds for Hydrogen Evolution Reaction

*Xingqun Zheng<sup>#a</sup>, Lishan Peng<sup>#a</sup>, Li Li<sup>\*a</sup>, Na Yang<sup>a</sup>, Yanjun Yang<sup>a</sup>, Jing Li<sup>a</sup>,  
Jianchuan Wang<sup>a,b</sup> and Zidong Wei<sup>\*a</sup>*

<sup>a</sup>The State Key Laboratory of Power Transmission Equipment & System Security and New Technology, Chongqing Key Laboratory of Chemical Process for Clean Energy and Resource Utilization, School of Chemistry and Chemical Engineering, Chongqing University, Shazhengjie 174, Chongqing 400044. <sup>b</sup>Key Laboratory of Fuel Cell Technology of Hubei Province, Wuhan University of Technology, Wuhan 430070, P. R. China

\*Email: [liliracial@cqu.edu.cn](mailto:liliracial@cqu.edu.cn) ; [zdwei@cqu.edu.cn](mailto:zdwei@cqu.edu.cn) .

## 1. Experimental details

**Preparation of the Ni(OH)<sub>2</sub> precursors.** All chemical reagents used in this experiment were of analytical grade and were used without any further purification. Prior to the loading of the precursor, the Ni foam (50 mm×10 mm×1 mm) was ultrasonically cleaned in a 3.0 M HCl solution for 15 min to remove the surface oxide layer, then rinsed with DI water and dried in air. Afterwards, 35.0 mL of pink aqueous solutions consisting of 40.0 mM Ni(NO<sub>3</sub>)<sub>2</sub>•6H<sub>2</sub>O, 200.0 mM (NH<sub>2</sub>)<sub>2</sub>CO and 200.0 mM NH<sub>4</sub>F were transferred into a Teflon-lined stainless steel autoclave with the treated Ni foam, which was placed at a certain angle. The autoclave was sealed and subsequently heated to 120 °C for 6 h. When the hydrothermal reaction was over, the samples were washed with DI water and dried in an oven at 60 °C for 12 h.

**Preparation of the Ni-Ni<sub>3</sub>S<sub>2</sub>.** The Ni-based precursor was converted into Ni(SOH)<sub>x</sub> while maintained the morphology of the precursor using a simple hydrothermal treatment. A certain amount of Na<sub>2</sub>S•9H<sub>2</sub>O was added into DI water (35.0 mL) to form a homogenous solution. Then, the Na<sub>2</sub>S solution was transferred into the autoclave with the Ni(OH)<sub>2</sub> precursor and heated in an oven at 160°C for 6 h. After being cooled to room temperature naturally, the Ni foam was removed, washed with DI water and absolute ethanol several times each, and dried in an oven at 60 °C for 2 h. Finally, all the samples were reduced under a H<sub>2</sub>/N<sub>2</sub> atmosphere at 400 °C for 1 hour to obtain the Ni with different S contents. The Ni(OH)<sub>2</sub> precursor treated with the Na<sub>2</sub>S•9H<sub>2</sub>O with different concentration of 5.0 mM, 10.0 mM, 20.0 mM, 40.0 mM and 80.0 mM were marked as Ni-Ni<sub>3</sub>S<sub>2</sub>-1, Ni-Ni<sub>3</sub>S<sub>2</sub>-2, Ni-Ni<sub>3</sub>S<sub>2</sub>-3, Ni-Ni<sub>3</sub>S<sub>2</sub>-4, Ni-Ni<sub>3</sub>S<sub>2</sub>-5, respectively.

**Preparation of the pure Ni<sub>3</sub>S<sub>2</sub>.** The precursor of Ni(OH)<sub>2</sub> was immersed into a solution consisted of 0.1 g Na<sub>2</sub>S•9H<sub>2</sub>O and 35 mL N<sub>2</sub>H<sub>4</sub> H<sub>2</sub>O in a 40 mL Teflon-lined stainless steel autoclave. The autoclave was then sealed and maintained at 180 °C for 12 h. After being cooled to room

temperature naturally, the Ni foam was removed, washed with DI water and absolute ethanol several times each, and dried in an oven at 60 °C for 2 h.

## **2. Structure and morphology characterization**

The surface morphology and the microstructure of the catalysts were analyzed by X-ray diffraction (XRD-6000, Shimadzu), X-ray photoelectron spectroscopy (XPS, PHI 550 ESCA/SAM), field-emission scanning electron microscopy (FE-SEM, JSM-7800, Japan), respectively.

## **3. Electrochemical characterizations**

Electrochemical measurements were performed in 1 M KOH alkaline electrolyte with a three-electrode cell system by a CHI660D electrochemical analyzer (CH Instruments, Inc., Shanghai). Sizable and shapeable electrodes can be prepared by simply tailoring the Ni foam, and the obtained Ni-Ni<sub>3</sub>S<sub>2</sub> can be directly used as the working electrode (1 cm<sup>2</sup>) without employing extra substrates (e.g., glassy-carbon electrode) or binders (e.g., Nafion). A carbon rod in parallel orientation to the working electrode was used as the counter electrode with a distance of 1.0 cm and an Hg/HgO electrode was used as the reference electrode. The electrolyte was degassed by bubbling N<sub>2</sub> for at least 30 minutes before the electrochemical measurements. Linear sweep voltammetry (LSV) was performed in N<sub>2</sub> saturated aqueous solution with a scan rate of 10 mV·s<sup>-1</sup> in a range from 0.2 to -0.6 V.

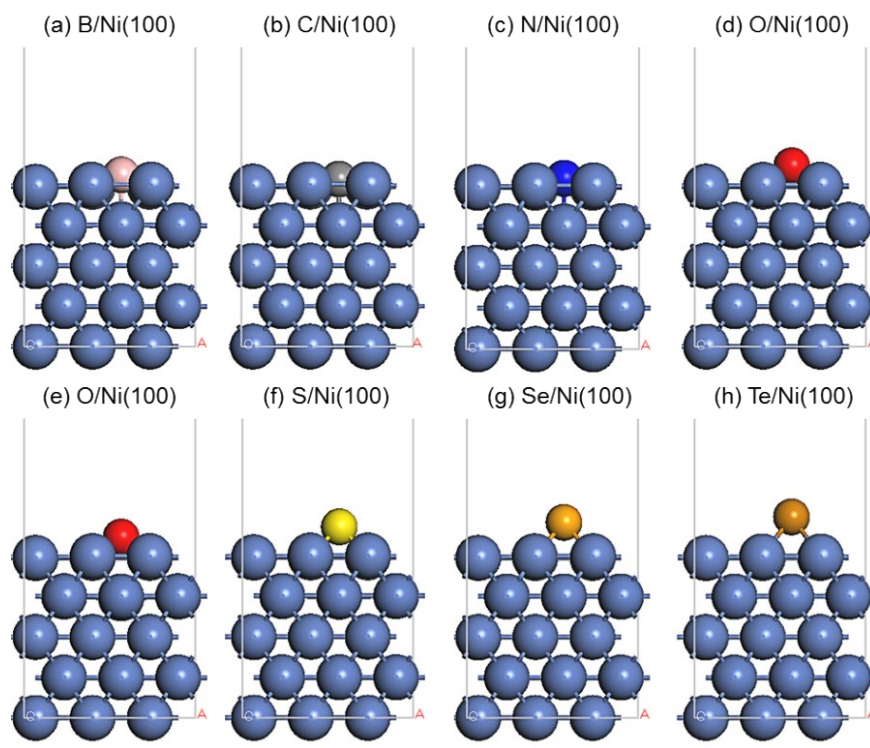

**Fig. S1.** The side view of the stable structure for each X/Ni(100) system. Color code: dusty blue, Ni atoms; other color, X atoms.

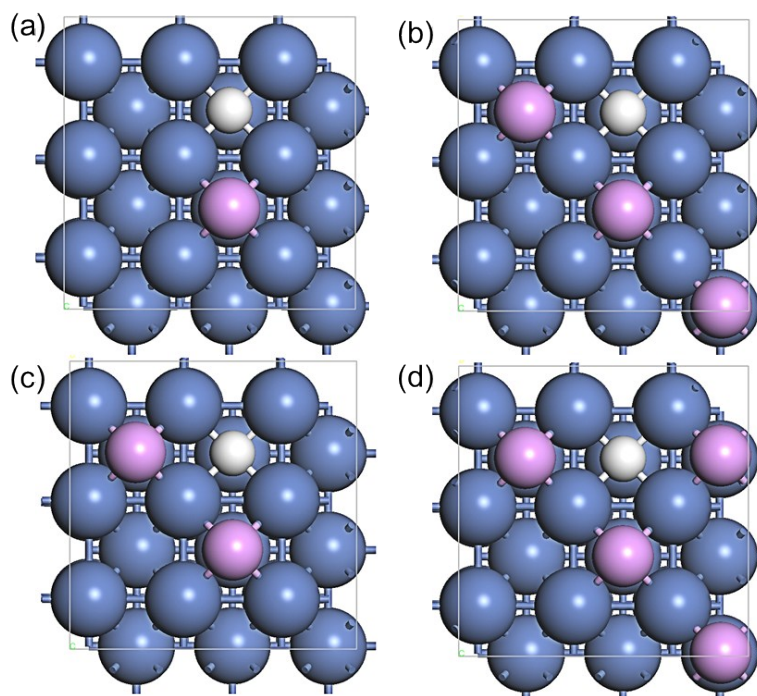

**Fig. S2.** The top view of unit cell structures of  $X_n/\text{Ni}(100)$  with H (white ball) adsorbed on them: (a)  $X/\text{Ni}(100)$ ; (b)  $X_2/\text{Ni}(100)$ ; (c)  $X_3/\text{Ni}(100)$ ; (d)  $X_4/\text{Ni}(100)$ .

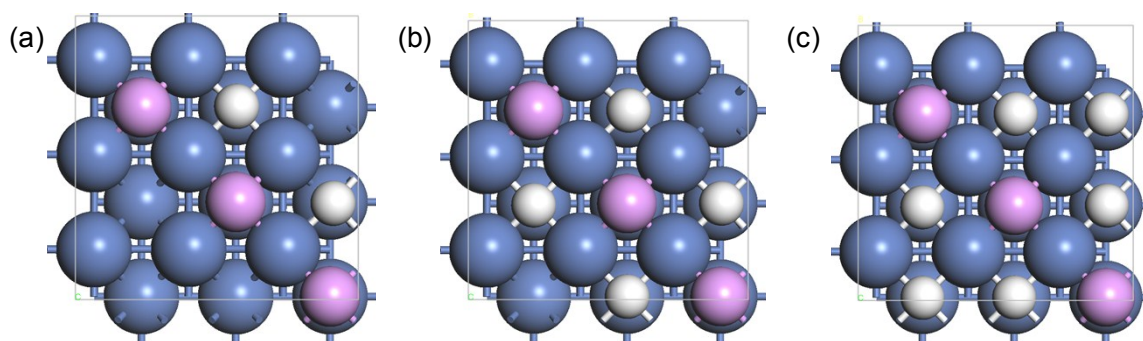

**Fig. S3.** The top view of unit cell structures of  $X_3/\text{Ni}(100)$  with different H coverage ( $\theta_H$ ): (a)  $\theta_H=1/3$ ; (b)  $\theta_H=2/3$ ; (c)  $\theta_H=1$ .

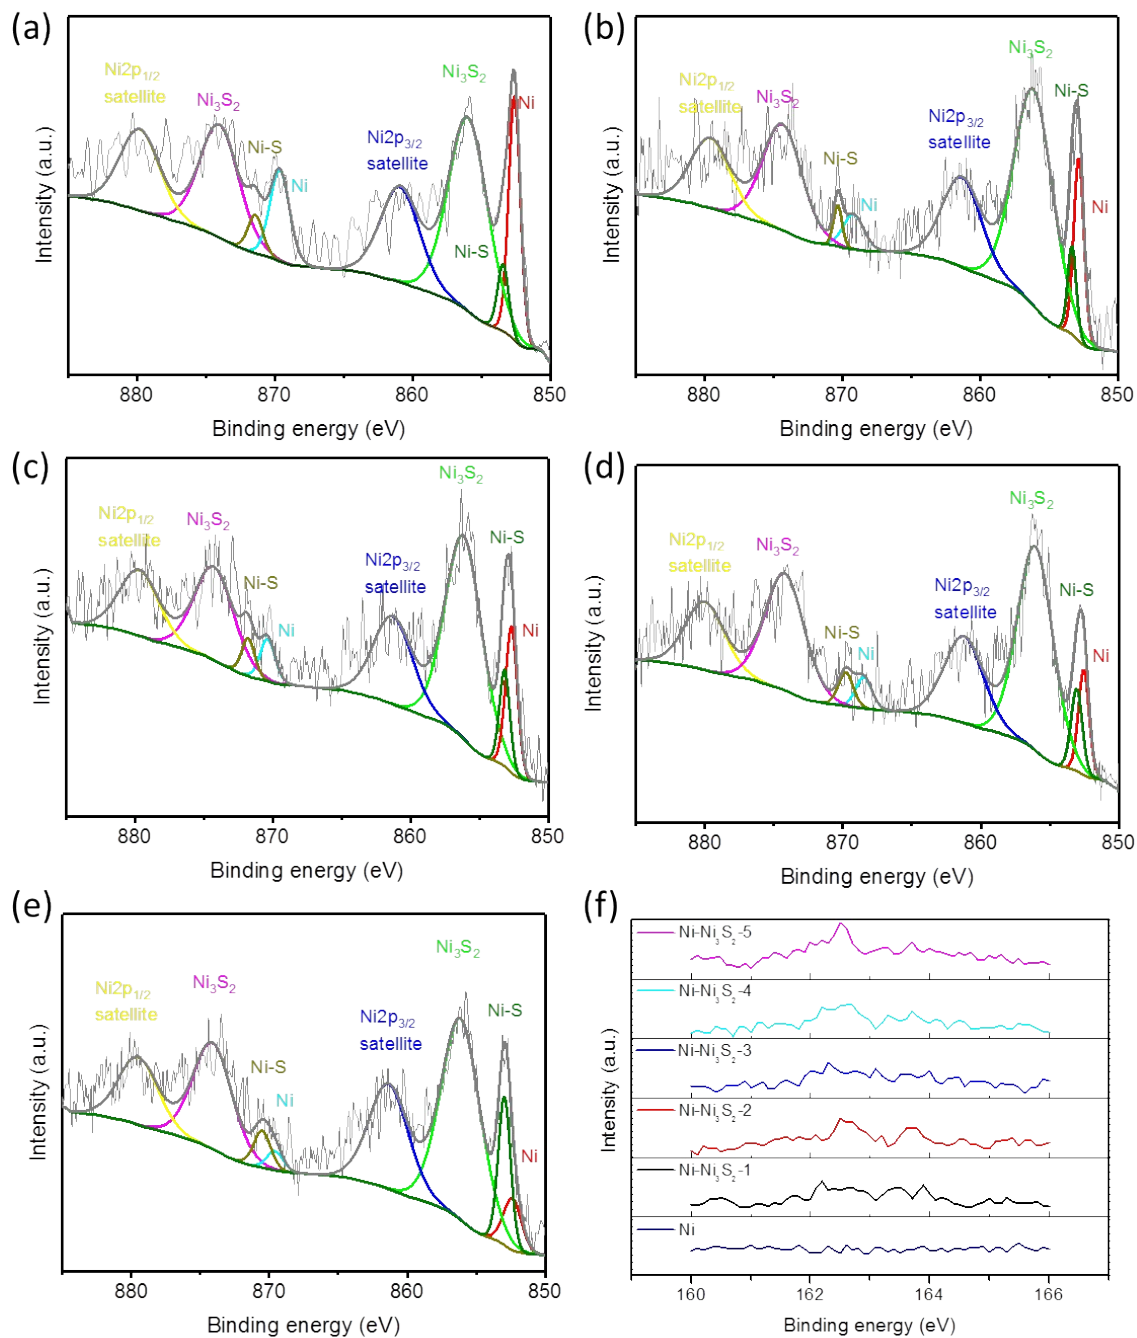

**Fig. S4.** Ni 2p core level X-ray photoelectron spectra (XPS): (a) Ni-Ni<sub>3</sub>S<sub>2</sub>-1; (b) Ni-Ni<sub>3</sub>S<sub>2</sub>-2; (c) Ni-Ni<sub>3</sub>S<sub>2</sub>-3; (d) Ni-Ni<sub>3</sub>S<sub>2</sub>-4; (e) Ni-Ni<sub>3</sub>S<sub>2</sub>-5; (f) S 2p core level XPS spectra of the Ni based catalysts

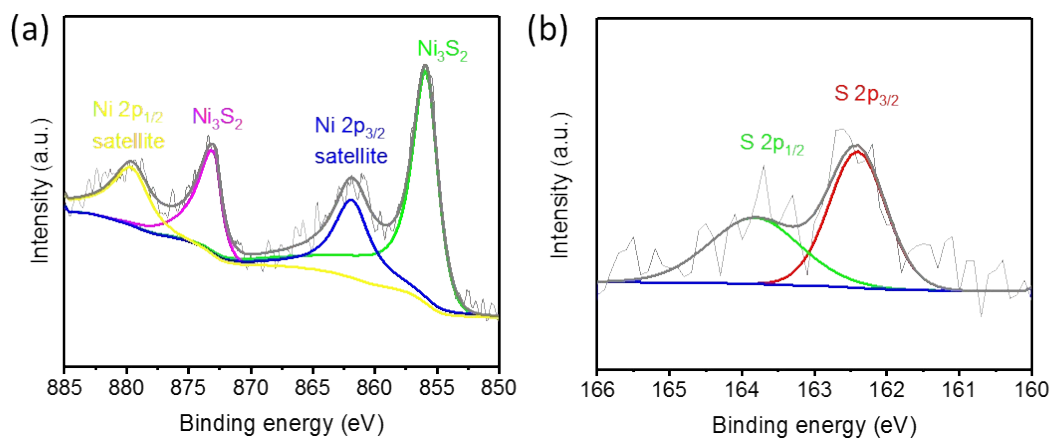

**Fig. S5.** Ni 2p and S 2p XPS of pure  $\text{Ni}_3\text{S}_2$  catalyst.

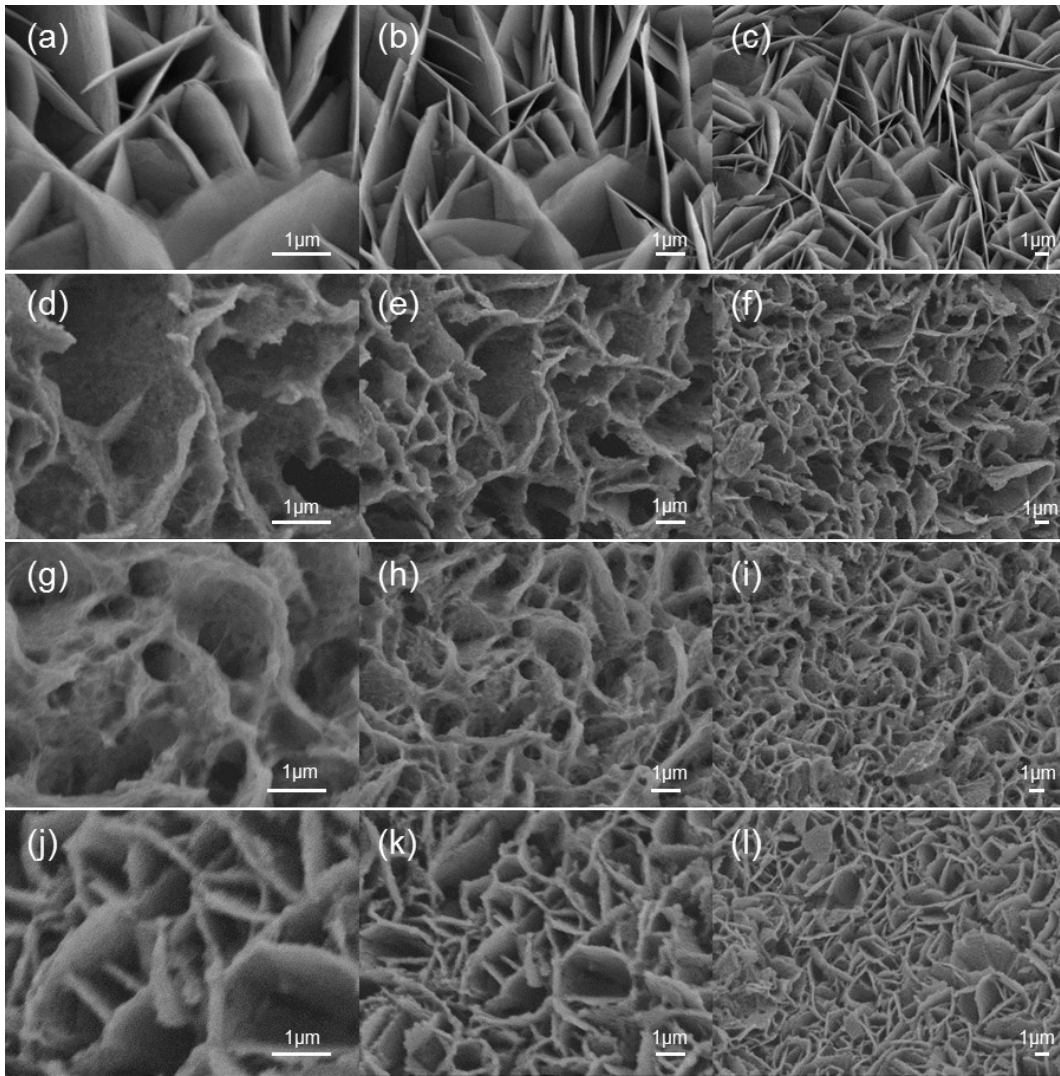

**Fig. S6.** The scanning electron microscopy (SEM) images with different magnifications: (a-c) Ni; (d-f) Ni-Ni<sub>3</sub>S<sub>2</sub>-1; (g-i) Ni-Ni<sub>3</sub>S<sub>2</sub>-3; (j-l) Ni-Ni<sub>3</sub>S<sub>2</sub>-5.



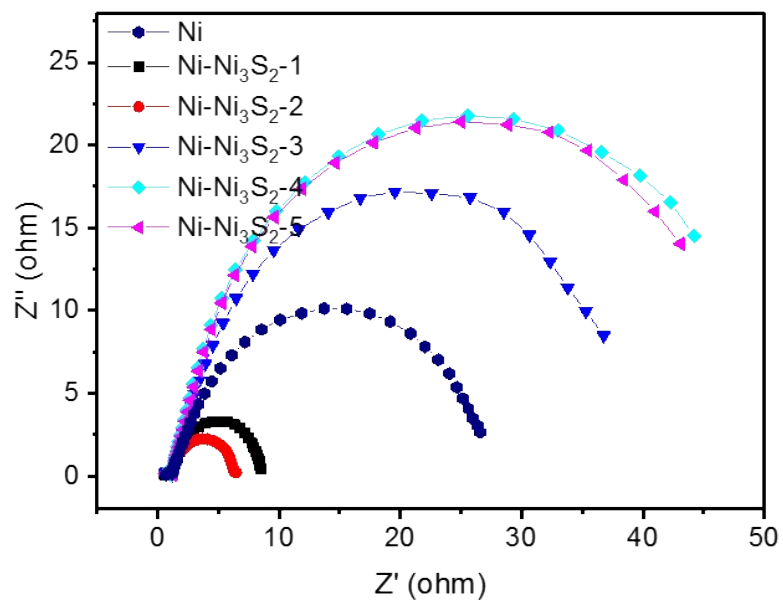

**Fig. S7.** Nyquist plots and the corresponding fitted curves of all samples.

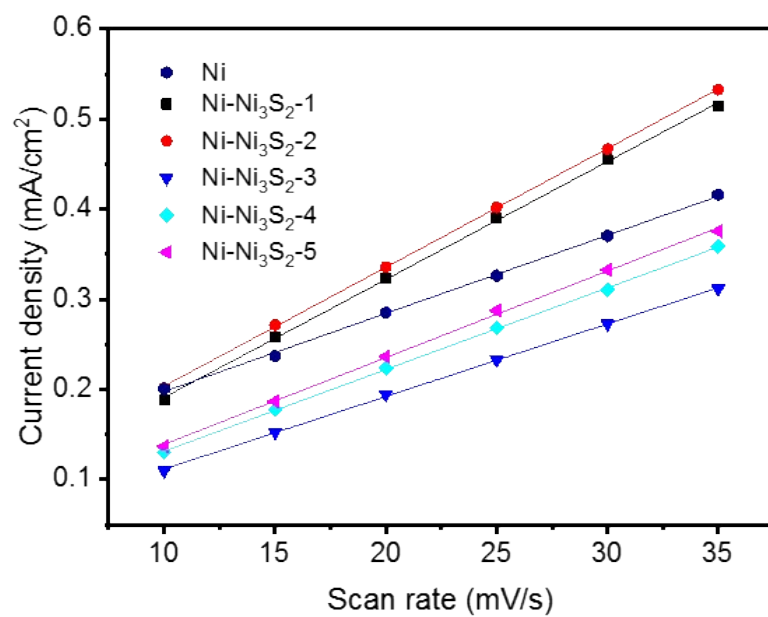

**Fig. S8.** Scan rate dependence of the current densities of all samples.

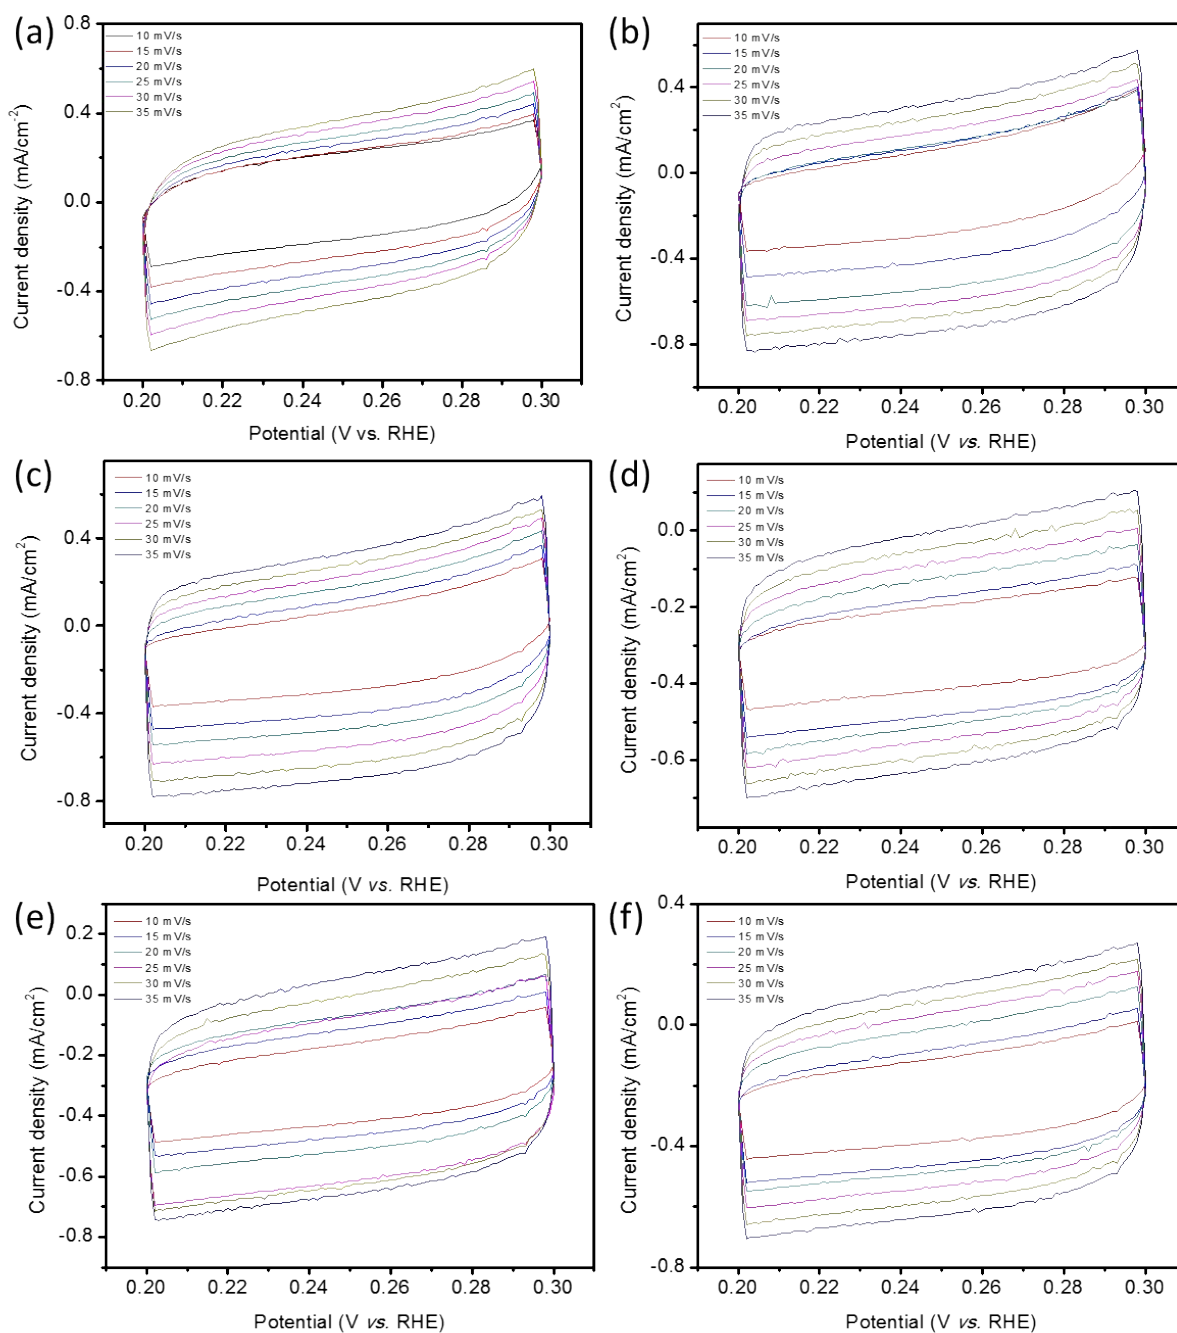

**Fig. S9.** Cyclic voltammograms of each sample: (a) Ni, (b) Ni-Ni<sub>3</sub>S<sub>2</sub>-1; (c) Ni-Ni<sub>3</sub>S<sub>2</sub>-2; (d) Ni-Ni<sub>3</sub>S<sub>2</sub>-3; (e) Ni-Ni<sub>3</sub>S<sub>2</sub>-4; (f) Ni-Ni<sub>3</sub>S<sub>2</sub>-5 in 0.20 – 0.30 V vs. RHE at scan rates from 10 to 35 mV·s<sup>-1</sup> in 1.0 M KOH

**Table S1.** Element electronegativity<sup>1</sup> ( $\chi_X$ ), atom radius<sup>2</sup> ( $R_X/\text{\AA}$ ), X-Ni bond length ( $d_{X-\text{Ni}}/\text{\AA}$ ) and interface Ni-Ni bond length ( $d_{\text{Ni-Ni}}/\text{\AA}$ ) of each X/Ni(100) system and the Bader charge of X ( $Q_X$ ) and interface Ni ( $Q_{\text{Ni}}$ ).

| System     | $\chi_{\text{Ni}}$ or $\chi_X$ | $R_{\text{Ni}}$ or $R_X/\text{\AA}$ | Bond length/ $\text{\AA}$ |                    | Bader charge/ $e$ |                 |
|------------|--------------------------------|-------------------------------------|---------------------------|--------------------|-------------------|-----------------|
|            |                                |                                     | $d_{X-\text{Ni}}$         | $d_{\text{Ni-Ni}}$ | $Q_X$             | $Q_{\text{Ni}}$ |
| Ni(100)    | 1.91                           | 1.35                                | -                         | 2.492              | -                 | -0.009          |
| B/Ni(100)  | 2.04                           | 0.85                                | 1.906                     | 2.628              | -0.107            | 0.015           |
| C/Ni(100)  | 2.55                           | 0.70                                | 1.837                     | 2.579              | -0.750            | 0.160           |
| N/Ni(100)  | 3.04                           | 0.65                                | 1.833                     | 2.555              | -0.979            | 0.205           |
| O/Ni(100)  | 3.44                           | 0.60                                | 1.947                     | 2.489              | -0.930            | 0.212           |
| S/Ni(100)  | 2.58                           | 1.00                                | 2.184                     | 2.536              | -0.504            | 0.113           |
| Se/Ni(100) | 2.55                           | 1.15                                | 2.332                     | 2.552              | -0.323            | 0.058           |
| Te/Ni(100) | 2.10                           | 1.40                                | 2.503                     | 2.567              | -0.048            | -0.010          |

**Table S2.** X binding energies ( $\Delta E_X$ ) and H adsorption energy ( $\Delta E_{\text{H}}$ ) (in eV), zero-point energies  $\Delta ZPE$  (in eV), entropies multiplied by T (T = 298.15 K) (in eV), adsorption free energies  $\Delta G_{\text{H}^*}$  (in eV) of Ni(100) and all X/Ni(100) systems.

| Systems    | $\Delta E_X$ | $\Delta E_{\text{H}^*}$ | $\Delta ZPE$ | $T\Delta S$ | $\Delta G_{\text{H}^*}$ |
|------------|--------------|-------------------------|--------------|-------------|-------------------------|
| Ni(100)    | -            | -0.490                  | -0.017       | 0.202       | -0.305                  |
| B/Ni(100)  | -7.115       | -0.478                  | -0.023       | 0.202       | -0.299                  |
| C/Ni(100)  | -8.270       | -0.476                  | -0.019       | 0.202       | -0.293                  |
| N/Ni(100)  | -6.130       | -0.442                  | -0.016       | 0.202       | -0.256                  |
| O/Ni(100)  | -6.007       | -0.402                  | -0.015       | 0.202       | -0.215                  |
| S/Ni(100)  | -6.014       | -0.374                  | -0.016       | 0.202       | -0.188                  |
| Se/Ni(100) | -5.349       | -0.371                  | -0.017       | 0.202       | -0.186                  |
| Te/Ni(100) | -4.906       | -0.366                  | -0.019       | 0.202       | -0.183                  |
| Pt(111)    | -            | -0.380                  | 0.000        | 0.202       | -0.178                  |

**Table S3.** The  $\Delta E_{H^*}$ ,  $\Delta ZPE$  (in eV), entropies multiplied by T (T = 298.15 K) (in eV),  $\Delta G_{H^*}$  (in eV) of  $X_n/Ni(100)$  (X=O, S, Se, Te) systems.

| Number of X(n) | Systems                  | $\Delta E_{H^*}$ | $\Delta ZPE$ | $T\Delta S$ | $\Delta G_{H^*}$ |
|----------------|--------------------------|------------------|--------------|-------------|------------------|
| 2              | O <sub>2</sub> /Ni(100)  | -0.327           | -0.007       | -0.202      | -0.132           |
|                | S <sub>2</sub> /Ni(100)  | -0.324           | -0.008       | -0.202      | -0.130           |
|                | Se <sub>2</sub> /Ni(100) | -0.335           | -0.009       | -0.202      | -0.142           |
|                | Te <sub>2</sub> /Ni(100) | -0.347           | -0.011       | -0.202      | -0.156           |
| 3              | O <sub>3</sub> /Ni(100)  | -0.305           | 0.001        | -0.202      | -0.102           |
|                | S <sub>3</sub> /Ni(100)  | -0.276           | -0.001       | -0.202      | -0.075           |
|                | Se <sub>3</sub> /Ni(100) | -0.284           | -0.001       | -0.202      | -0.083           |
|                | Te <sub>3</sub> /Ni(100) | -0.297           | -0.002       | -0.202      | -0.097           |
| 4              | O <sub>4</sub> /Ni(100)  | -0.036           | 0.015        | -0.202      | 0.181            |
|                | S <sub>4</sub> /Ni(100)  | -0.036           | 0.017        | -0.202      | 0.182            |
|                | Se <sub>4</sub> /Ni(100) | -0.076           | 0.014        | -0.202      | 0.140            |
|                | Te <sub>4</sub> /Ni(100) | -0.127           | 0.011        | -0.202      | 0.086            |

**Table S4.** The  $\Delta E_{H^*}$ ,  $\Delta ZPE$  (in eV), entropies multiplied by T (T = 298.15 K) (in eV),  $\Delta G_{H^*}$  (in eV) of  $X_3/Ni(100)$  (X=O, S, Se, Te) with different  $\theta_H$  (from 1/3 to 1).

| $\theta_H$ | Systems                 | $\Delta E_{H^*}$ | $\Delta ZPE$ | $T\Delta S$ | $\Delta G_{H^*}$ |
|------------|-------------------------|------------------|--------------|-------------|------------------|
| 1/3        | O <sub>3</sub> Ni(100)  | -0.307           | 0.004        | -0.202      | -0.101           |
|            | S <sub>3</sub> Ni(100)  | -0.273           | 0.001        | -0.202      | -0.070           |
|            | Se <sub>3</sub> Ni(100) | -0.283           | 0.001        | -0.202      | -0.079           |
|            | Te <sub>3</sub> Ni(100) | -0.296           | -0.001       | -0.202      | -0.095           |
| 2/3        | O <sub>3</sub> Ni(100)  | -0.279           | 0.005        | -0.202      | -0.071           |
|            | S <sub>3</sub> Ni(100)  | -0.250           | 0.006        | -0.202      | -0.041           |
|            | Se <sub>3</sub> Ni(100) | -0.264           | 0.004        | -0.202      | -0.058           |
|            | Te <sub>3</sub> Ni(100) | -0.282           | 0.002        | -0.202      | -0.078           |
| 1          | O <sub>3</sub> Ni(100)  | -0.259           | 0.009        | -0.202      | -0.048           |
|            | S <sub>3</sub> Ni(100)  | -0.229           | 0.010        | -0.202      | -0.016           |
|            | Se <sub>3</sub> Ni(100) | -0.249           | 0.008        | -0.202      | -0.039           |
|            | Te <sub>3</sub> Ni(100) | -0.269           | 0.006        | -0.202      | -0.061           |

**Table S5.** Atomic ratio of Ni, S coming from XPS analysis.

| <i>Samples</i>                       | <i>Area of Ni 2p3/2</i> | <i>Area of Ni-S 2p3/2</i> | <i>S coverage</i> |
|--------------------------------------|-------------------------|---------------------------|-------------------|
| Ni-Ni <sub>3</sub> S <sub>2</sub> -1 | 1253.58                 | 327.06                    | 20.67%            |
| Ni-Ni <sub>3</sub> S <sub>2</sub> -2 | 670.41                  | 272.95                    | 28.93%            |
| Ni-Ni <sub>3</sub> S <sub>2</sub> -3 | 660.26                  | 390.58                    | 37.17%            |
| Ni-Ni <sub>3</sub> S <sub>2</sub> -4 | 435.05                  | 358.86                    | 45.20%            |
| Ni-Ni <sub>3</sub> S <sub>2</sub> -5 | 359.25                  | 710.93                    | 66.43%            |

**Table S6.** The surface S:Ni atomic ratio, overpotential@10mA/cm<sup>2</sup> (mV), Tafel slope(mV dec<sup>-1</sup>), C<sub>dl</sub> (mF·cm<sup>-2</sup>) and relative surface area of Ni and all Ni-Ni<sub>3</sub>S<sub>2</sub> catalysts.

| Catalysts                                                           | S:Ni (%)     | Overpotential @10mA·cm <sup>-2</sup> (mV) | Tafel slope (mV·dec <sup>-1</sup> ) | C <sub>dl</sub> (mF·cm <sup>-2</sup> ) | Relative surface area | Ref          |
|---------------------------------------------------------------------|--------------|-------------------------------------------|-------------------------------------|----------------------------------------|-----------------------|--------------|
| Ni                                                                  | -            | 225                                       | 126                                 | 8.67                                   | 0.66                  | In this work |
| Ni-Ni <sub>3</sub> S <sub>2</sub> -1                                | 20.67        | 129                                       | 126                                 | 13.08                                  | 0.99                  | In this work |
| <b>Ni-Ni<sub>3</sub>S<sub>2</sub>-2</b>                             | <b>28.93</b> | <b>114</b>                                | <b>122</b>                          | <b>13.18</b>                           | <b>1</b>              | In this work |
| Ni-Ni <sub>3</sub> S <sub>2</sub> -3                                | 37.17        | 154                                       | 157                                 | 7.34                                   | 0.56                  | In this work |
| Ni-Ni <sub>3</sub> S <sub>2</sub> -4                                | 45.20        | 180                                       | 154                                 | 9.06                                   | 0.69                  | In this work |
| Ni-Ni <sub>3</sub> S <sub>2</sub> -5                                | 66.43        | 181                                       | 159                                 | 9.61                                   | 0.93                  | In this work |
| Ni <sub>2.3</sub> %CoS <sub>2</sub> /CC                             | --           | 136                                       | 106                                 | --                                     | --                    | [3]          |
| NiCoS/CC NSs                                                        | --           | 140                                       | 96                                  | --                                     | --                    | [4]          |
| NiS/Ni Foam                                                         | --           | 150                                       | 83                                  | --                                     | --                    | [5]          |
| NiCo <sub>2</sub> S <sub>4</sub> NA/CC                              | --           | ~190                                      | 141                                 | --                                     | --                    | [6]          |
| Ni <sub>3</sub> S <sub>2</sub> @Ni                                  | --           | 195                                       | 107                                 | --                                     | --                    | [7]          |
| Ni <sub>3</sub> S <sub>2</sub> -Ni                                  | --           | 270                                       | 141                                 | --                                     | --                    | [7]          |
| Ni <sub>x</sub> S <sub>y</sub> /NiF                                 | --           | 230                                       | 87                                  | --                                     | --                    | [8]          |
| Co <sub>9</sub> S <sub>8</sub> -Ni <sub>x</sub> S <sub>y</sub> /NiF | --           | 163                                       | 88                                  | --                                     | --                    | [8]          |

## REFERENCE

- 1 L. Pauling, *The Nature of the Chemical Bond*, 3rd ed, Cornell University Press: Ithaca, New York, 1960
- 2 J. C. Slater, Atomic Radii in Crystals. *J. Chem. Phys.*, 1964, **41**, 3199-3204.
- 3 W. Fang, D. Liu, Q. Lu, X. Sun and A. M. Asiri, *Electrochem. Commun.*, 2016, **63**, 60-64.
- 4 C. Tang, Z. Pu, Q. Liu, A. M. Asiri, Y. Luo and X. Sun, *Int. J. Hydrogen Energy*, 2015, **40**, 4727-4732.
- 5 W. Zhu, X. Yue, W. Zhang, S. Yu, Y. Zhang, J. Wang and J. Wang, *Chem. Commun.*, 2016, **52**, 1486-1489.
- 6 D. Liu, Q. Lu, Y. Luo, X. Sun and A. M. Asiri, *Nanoscale*, 2015, **7**, 15122-15126.
- 7 C. Ouyang, X. Wang, C. Wang, X. Zhang, J. Wu, Z. Ma, S. Dou and S. Wang, *Electrochim. Acta*, 2015, **174**, 297-301.
- 8 D. Ansovini, C. J. J. Lee, C. S. Chua, J. Ong, H. R. Tan, W. Webb, R. Raja and Y.-F. Lim, *J. Mater. Chem. A*, 2016, **4**, 9744-9749.
